# Supplementary material for: Brassica oleracea L. var. botrytis Leaf Extract Alleviates Gentamicin-Induced Hepatorenal Injury in Rats—Possible Modulation of IL-1β and NF-κB Activity Assisted with Computational Approach
Source: MDPI journal article supplement (doi:10.3390/life12091370), 2022-09-02
Supplement: s1 [file s1]

**Supplementary-S: 1D- and 2D- NMR**  
**spectroscopic data of pure isolated compound**

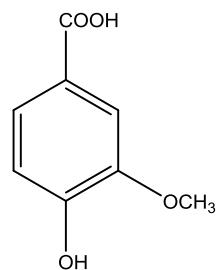

**(VA)**

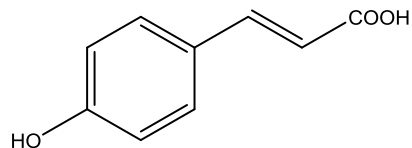

**(PCA)**

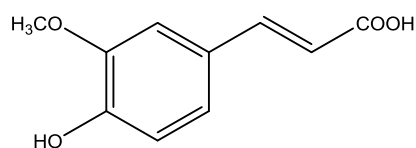

**(FA)**

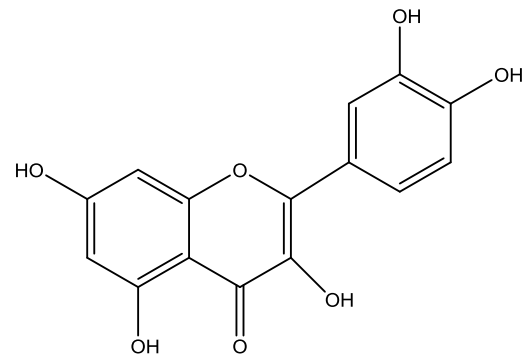

**(QRN)**

Structures of pure isolated constituents from cauliflower leaf .  
Vanillic acid (**VA**), p-coumaric acid (**PCA**), ferulic acid (**FA**) and quercetin (**QRN**).

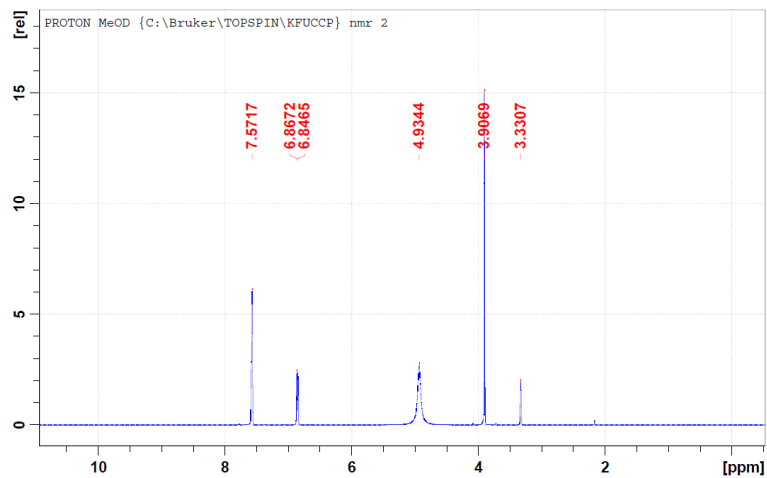

$^1\text{H}$ -NMR full spectrum of VA (400 MHz,  $\text{CD}_3\text{OD}$ )

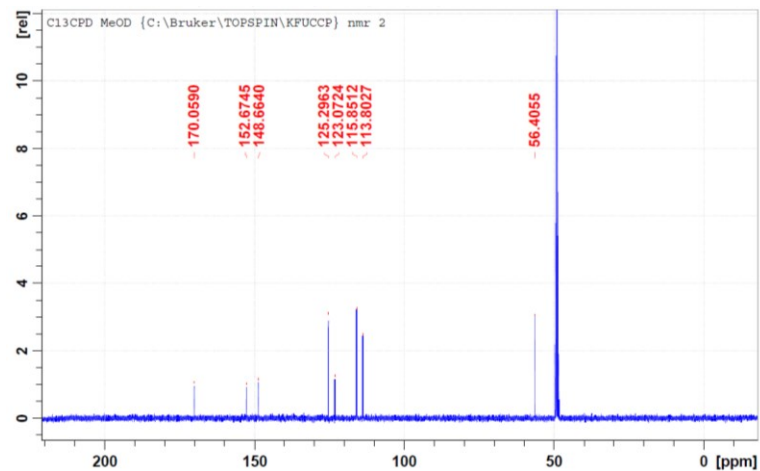

$^{13}\text{C}$ -NMR spectrum of VA (100 MHz,  $\text{CD}_3\text{OD}$ )

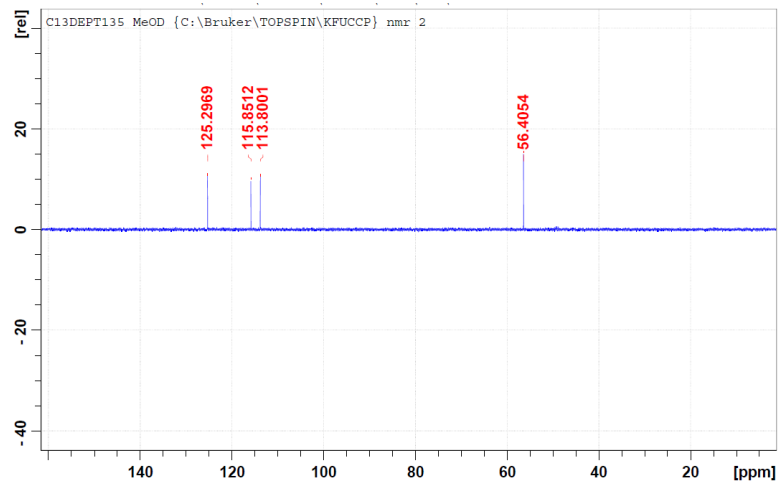

DEPT spectrum of VA (100 MHz,  $\text{CD}_3\text{OD}$ )

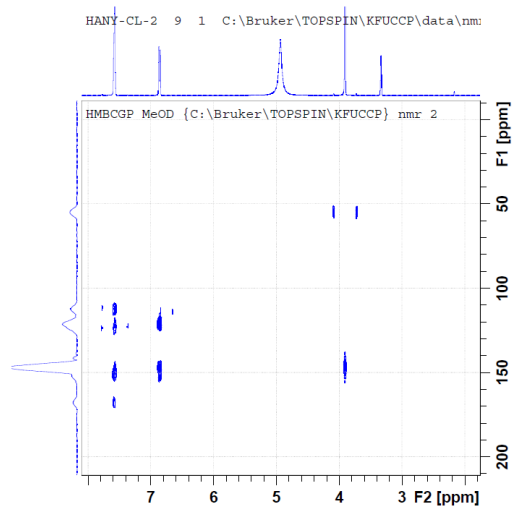

HMBC spectrum of VA

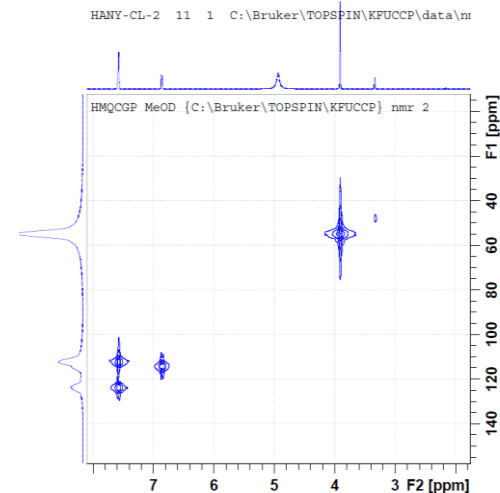

HMQC spectrum of VA

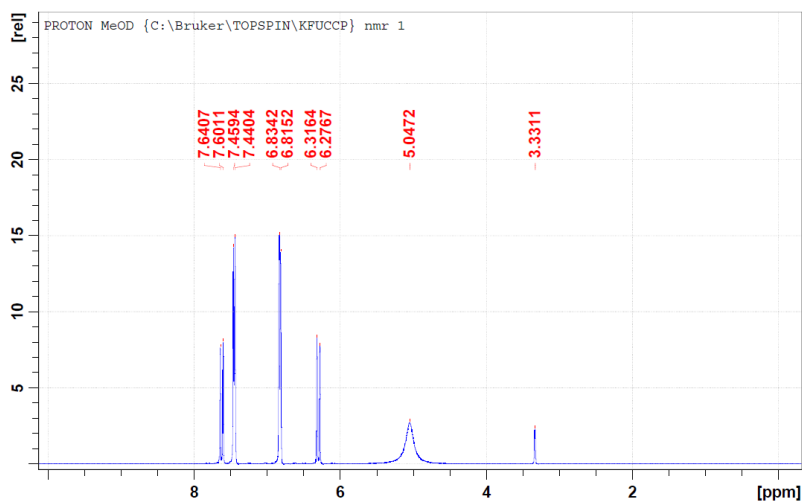

$^1\text{H}$ -NMR full spectrum of PCA (400 MHz,  $\text{CD}_3\text{OD}$ )

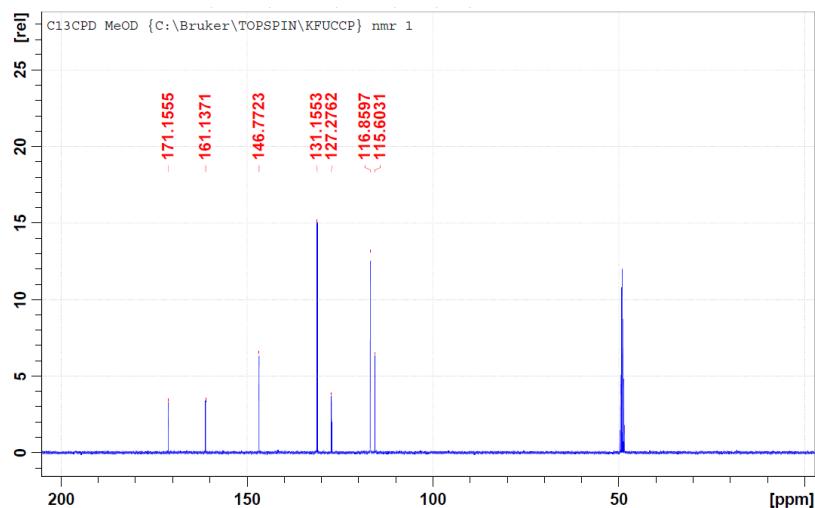

$^{13}\text{C}$ -NMR spectrum of PCA (100 MHz,  $\text{CD}_3\text{OD}$ )

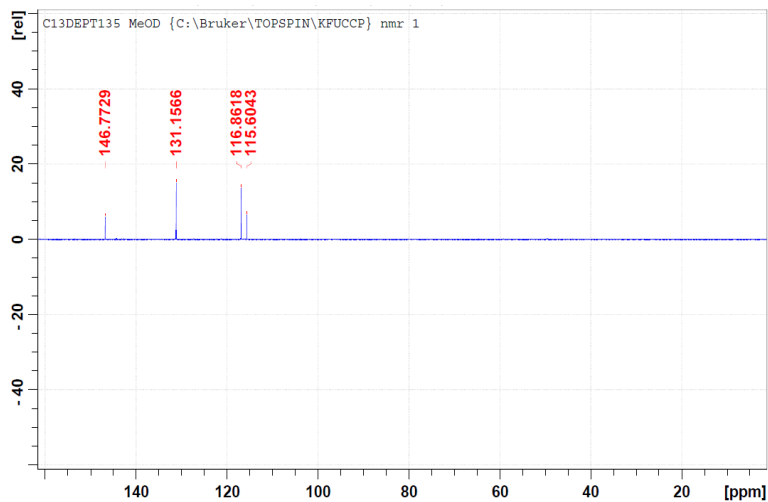

DEPT spectrum of PCA (100 MHz,  $\text{CD}_3\text{OD}$ )

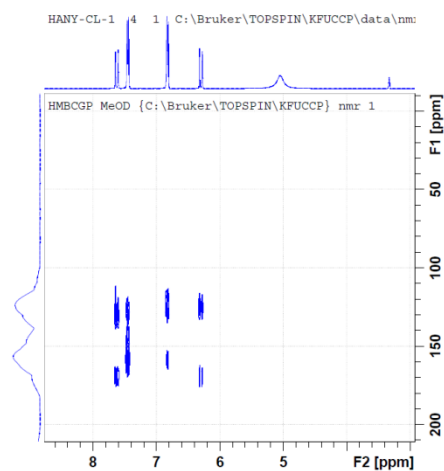

HMBC spectrum of PCA

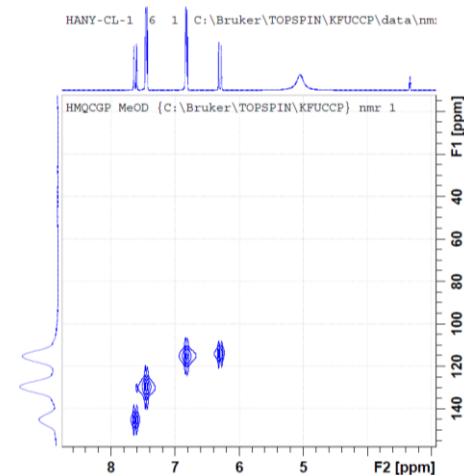

HMQC spectrum of PCA

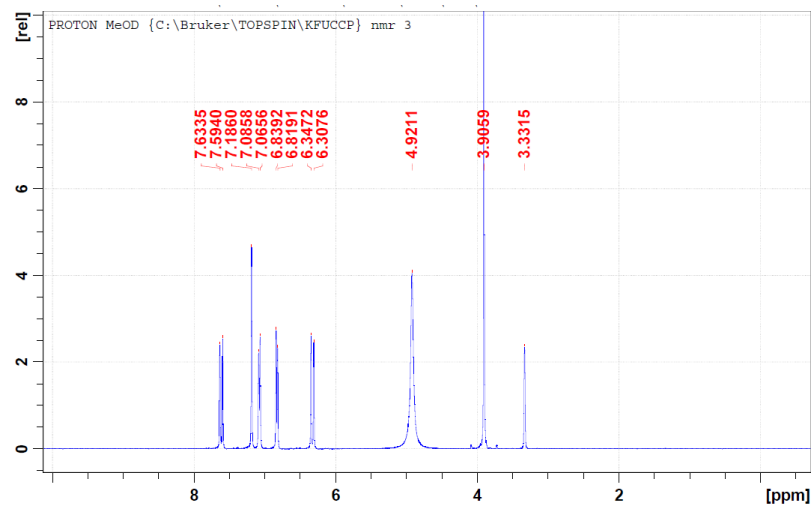

**$^1\text{H}$ -NMR full spectrum of FA (400 MHz,  $\text{CD}_3\text{OD}$ )**

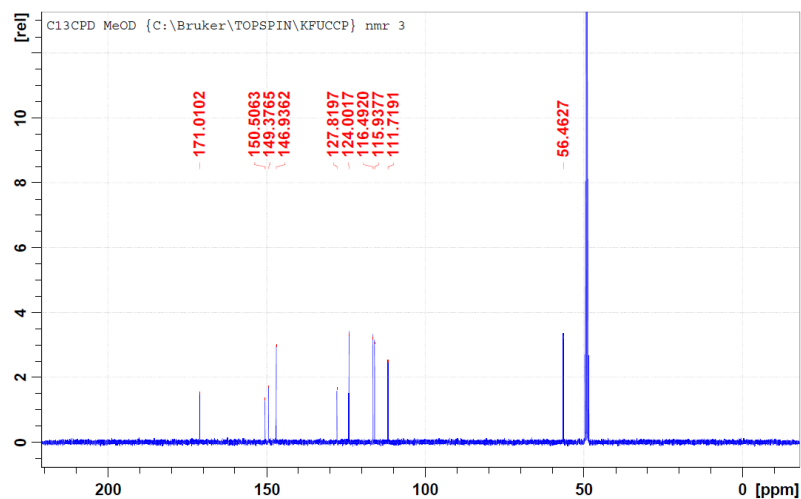

**$^{13}\text{C}$ -NMR spectrum of FA (100 MHz,  $\text{CD}_3\text{OD}$ )**

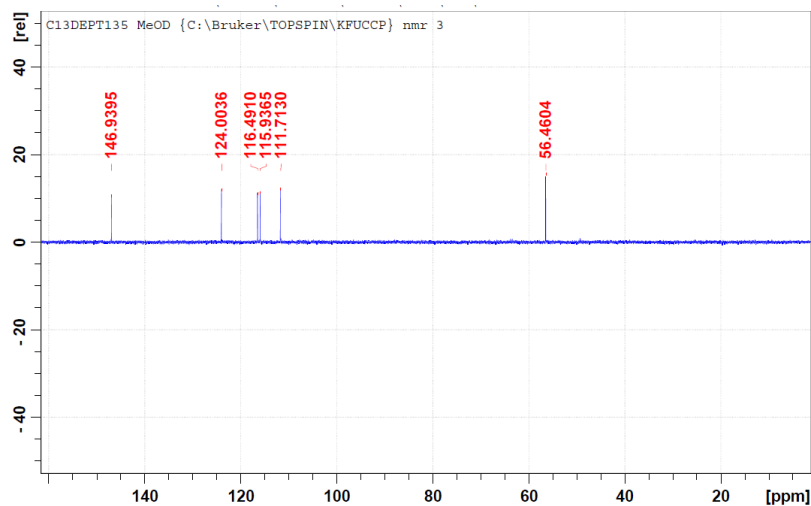

**DEPT spectrum of FA (100 MHz,  $\text{CD}_3\text{OD}$ )**

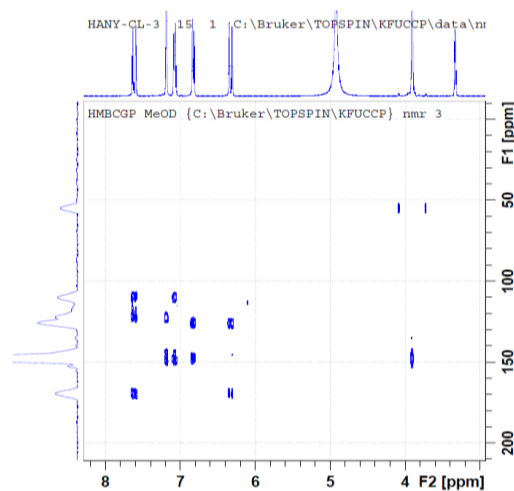

**HMBC spectrum of FA**

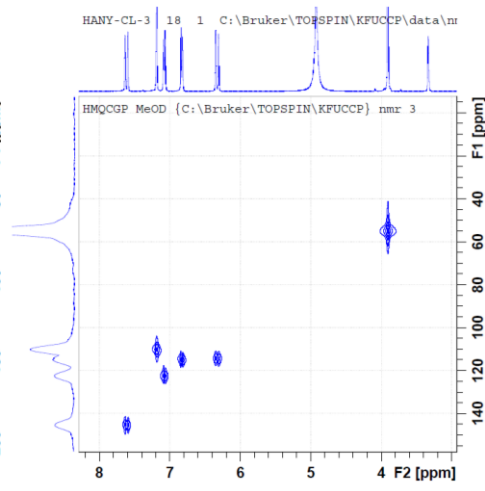

**HMQC spectrum of FA**

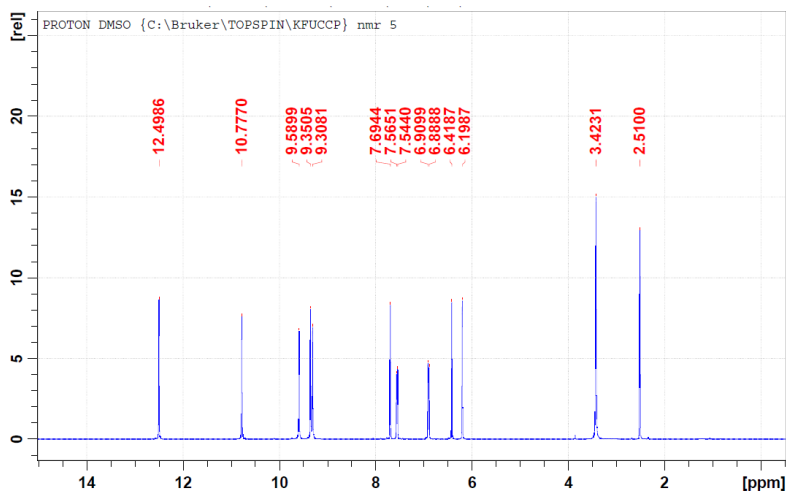

**$^1\text{H}$ -NMR full spectrum of QRN (400 MHz, DMSO- $d_6$ )**

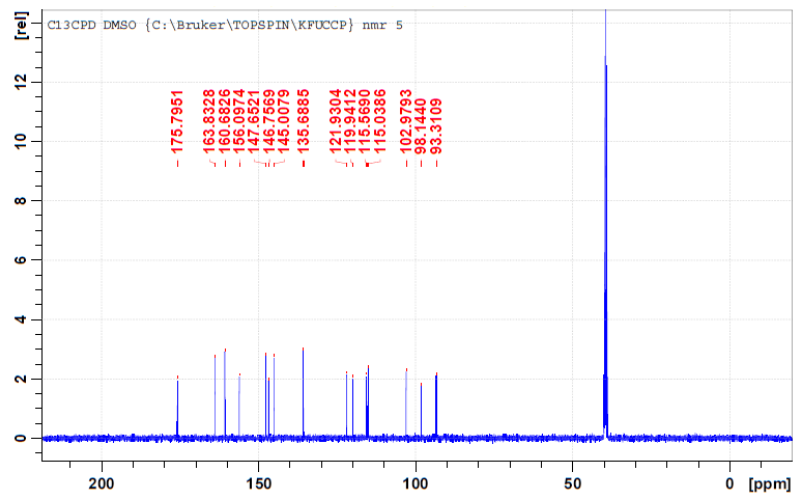

**$^{13}\text{C}$ -NMR spectrum of QRN (100 MHz, DMSO- $d_6$ )**

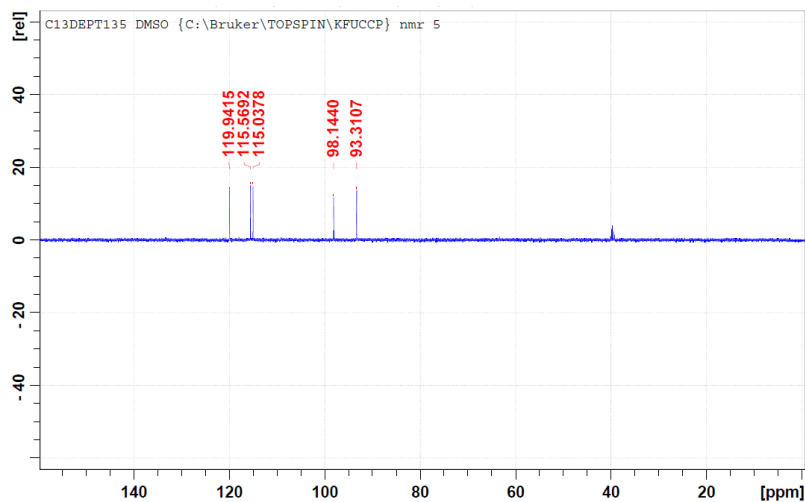

**DEPT spectrum of QRN (100 MHz, DMSO- $d_6$ )**

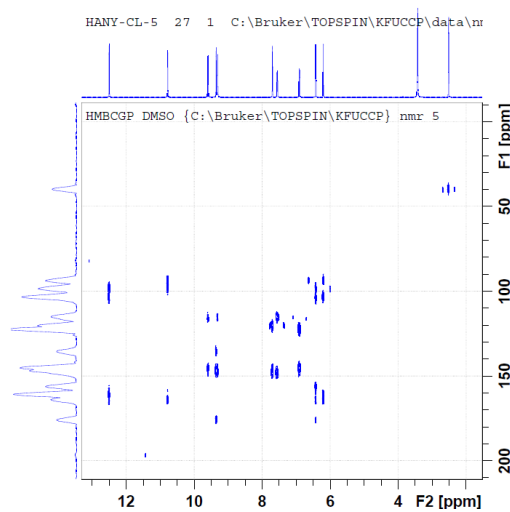

**HMBC spectrum of QRN**

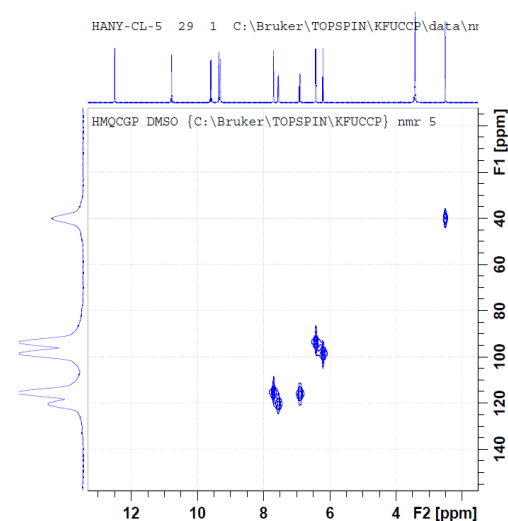

**HMQC spectrum of QRN**
